Structural bioinformatics

# SAMPDI-3D: predicting the effects of protein and DNA mutations on protein–DNA interactions

Gen Li, Shailesh Kumar Panday, Yunhui Peng and Emil Alexov  \*

Department of Physics and Astronomy, Clemson University, Clemson, SC 29634, USA

\*To whom correspondence should be addressed.

Associate Editor: Teresa Przytycka

Received on April 12, 2021; revised on June 28, 2021; editorial decision on July 29, 2021; accepted on July 31, 2021

## Abstract

**Motivation:** Mutations that alter protein–DNA interactions may be pathogenic and cause diseases. Therefore, it is extremely important to quantify the effect of mutations on protein–DNA binding free energy to reveal the molecular origin of diseases and to assist the development of treatments. Although several methods that predict the change of protein–DNA binding affinity upon mutations in the binding protein were developed, the effect of DNA mutations was not considered yet.

**Results:** Here, we report a new version of SAMPDI, the SAMPDI-3D, which is a gradient boosting decision tree machine learning method to predict the change of the protein–DNA binding free energy caused by mutations in both the binding protein and the bases of the corresponding DNA. The method is shown to achieve Pearson correlation coefficient of 0.76 and 0.80 in a benchmarking test against experimentally determined change of the binding free energy caused by mutations in the binding protein or DNA, respectively. Furthermore, three datasets collected from literature were used to do blind benchmark for SAMPDI-3D and it is shown that it outperforms all existing state-of-the-art methods. The method is very fast allowing for genome-scale investigations.

**Availability and implementation:** It is available as a web server and a stand-code at <http://compbio.clemson.edu/SAMPDI-3D/>.

**Contact:** [ealexov@clemson.edu](mailto:ealexov@clemson.edu)

**Supplementary information:** [Supplementary data](#) are available at *Bioinformatics* online.

## 1 Introduction

Protein–DNA interactions (PDIs) mediate many vital biological processes, such as transcription, replication and repair. Mutations in the binding protein or cognate DNA may affect PDIs and interaction networks by altering binding specificity and affinity. Such alterations of the wild-type PDI are frequently the causality of various diseases, including autism spectrum disorder, cancer and Alzheimer's disease (Jiao *et al.*, 2020; Wells *et al.*, 2019). Furthermore, understanding the effect of mutations on PDIs is not only important for classifying mutations into pathogenic or benign (Livingstone *et al.*, 2017; Williamson *et al.*, 2020) but also vital for developing therapeutic solutions (Chan *et al.*, 2008) and revealing the reasons of drug resistance (Stiewe and Haran, 2018). Quantifying these effects on PDIs requires evaluating the changes of binding free energy ( $\Delta\Delta G$ ) induced by mutations. While there are numerous reports of high-throughput experimental studies of effects of mutations on PDIs, they provide only the ranking of the affinity changes, but for  $\Delta\Delta G$ , still rely on traditional experiments (Katsamba *et al.*, 2002; Ryder *et al.*, 2008; Stockley, 2009; Velazquez-Campoy *et al.*, 2004; Vivian and Callis, 2001).

For protein mutations, there are several widely used experimental methods evaluating the effect of mutations on the PDIs. For example, electrophoretic mobility shift assay (EMSA) estimates the  $K_d$  value to examine the binding affinity between protein and DNA that based on the different electrophoretic mobility of protein–DNA complex and free DNA. Isothermal titration calorimetry (ITC) provides thermodynamic parameters related to the PDIs but requires a large amount of protein and DNA samples (Yang *et al.*, 2016). Surface plasmon resonance (SPR) and fluorescence methods can obtain the kinetics of the PDI at high concentrations of samples (Liang *et al.*, 2021). Besides the above methods, there are high-throughput methods for studying the effect of DNA mutations on PDIs. Protein binding microarrays (PBMs) and related methods utilize fluorescent antibodies against proteins to determine the binding to transcription factors (Berger *et al.*, 2006). High-throughput systematic evolution of ligands by exponential enrichment (HT-SELEX) is a method of enriching small populations of bound DNAs from a random sequence pool through polymerase chain reaction amplification (Riley *et al.*, 2014). Recently BEMSER method was reported that estimates transcription factors (TF) specificity by using the universal PBM data (Zhao *et al.*, 2012). More recently, the relative affinity of TF

was evaluated by combining EMSA and HT-SELEX methods (Dantas Machado *et al.*, 2020). Both above mentioned works provide valuable insights for protein–DNA binding, but their predictions are still based on PBM or HT-SELEX data, and thus do not result in predicting  $\Delta\Delta G$ . Because of that, one still uses the traditional experimental methods to measure binding affinity but they are time-consuming and costly for high-throughput studies.

Such a pressing needs for methods of predicting protein–DNA  $\Delta\Delta G$  caused by protein mutations have resulted in development of several computational methods, including mCSM-NA (Pires and Ascher, 2017), SAMPDI (Peng *et al.*, 2018) and PremPDI (Zhang *et al.*, 2018). The mCSM-NA (Pires and Ascher, 2017) method is based on graph-based structural signatures to predict the  $\Delta\Delta G$  caused by mutations in proteins bound to DNA/RNA. Our previous SAMPDI method is based on modified molecular mechanics Poisson-Boltzmann surface area (MM/PBSA) method enriched with knowledge-based terms to predict the  $\Delta\Delta G$  of protein–DNA upon single-protein mutation. The PremPDI (Zhang *et al.*, 2018), which was developed recently, is a method based on energy minimization and side-chain optimization algorithms to predict the  $\Delta\Delta G$  upon single protein mutation. However, none of the abovementioned methods attempted to explore the effect of DNA nucleotide mutations on protein–DNA  $\Delta\Delta G$ .

Broadly speaking, the computational methods for predicting protein–DNA  $\Delta\Delta G$  can be grouped into three classes: first principle-based (including MM/PBSA), machine learning (ML) and empirical. In the recent years, ML approaches became very popular because of their advantage to utilize a variety of features (structural, sequential, energetical and other features) to predict  $\Delta\Delta G$ , and thus allowing for more extensive ‘parametrization’, which in turn improves the predictions. However, the intrinsic data-driven nature of the ML method relies on a large and high-quality experimental dataset. The training set of the previous methods was derived from the ProNIT database (Kumar *et al.*, 2006), which is no longer updated after 2013 and it only included hundreds available experimental data points. Thus, ML protocol applied on such small dataset, compared with ML protocol trained on thousands experimental data points, may not be able to find existing patterns, which result in a protocol that is overfitted. Perhaps this was the reason why ML approaches were not extensively applied to predict protein–DNA  $\Delta\Delta G$ . However, with the progress on experimental works, the pool of data points increases and many new mutations with high-quality experimental  $\Delta\Delta G$ s have been published in recent years (Afek *et al.*, 2020; Wang *et al.*, 2020; Yang *et al.*, 2016).

The above mentioned methods for predicting protein–DNA  $\Delta\Delta G$ s, mCSM-NA (Pires and Ascher, 2017), SAMPDI (Peng *et al.*, 2018) and PremPDI (Zhang *et al.*, 2018), suffer of three main deficiencies: (i) the training set used in the developments was too small; (ii) the benchmarking did not include a blind set to test model’s performance and overfitting; and (iii) the existing methods model only evaluate the effect of protein’s mutations on  $\Delta\Delta G$ . The last one is particularly important in terms of understanding molecular effect of DNA mutations affecting protein–DNA affinity and resulting in serious diseases, such as genetic disorder (Yoshiura *et al.*, 2006) and cancers (Guo *et al.*, 2018).

Here, we report a new development of protein–DNA  $\Delta\Delta G$  predictor, SAMPDI-3D. The SAMPDI-3D is ML approach and uses a gradient boosting decision tree ML algorithm with features as physicochemical (PC) properties, structural properties of mutation site and protein–DNA interactions to predict the change of binding free energy resulting from either single point protein’s mutation or DNA’s mutation. The method achieves a Pearson correlation coefficient (PCC) of 0.76 [and mean square error (MSE) = 0.53 kcal/mol] and 0.80 (MSE = 0.39 kcal/mol) for mutations in protein or DNA as benchmarked against 419 protein and 463 DNA experimental  $\Delta\Delta G$ s taken from the ProNIT (Kumar *et al.*, 2006) database and literature. The SAMPDI-3D uses a much larger training set than previously reported approaches to avoid the risk of overfitting and it is shown to outperform existing state-of-the-art methods on the blind datasets. In addition, the performance of SAMPDI-3D on distinguishing disruptive mutations is much better than other existing

methods. The online web server and standalone code of SAMPDI-3D are freely available at <http://compbio.clemson.edu/SAMPDI-3D/>, which combined with the high computational speed makes the method excellent tool for genome-scale investigations.

## 2 Materials and methods

### 2.1 Dataset preparation

There are two databases: ProNIT (Kumar *et al.*, 2006) and dbAMEPNI (Liu *et al.*, 2018), which document experimentally determined values of changes of protein–DNA binding free energies ( $\Delta\Delta G$ ) upon mutations, derived from the published literature for protein–nucleic acid complexes with available experimental 3D structures. However, ProNIT is no longer updated and dbAMEPNI only focuses on single alanine-scanning mutations. In view of the above mentioned reasons, we respectively constructed two datasets containing cases of the single mutations in protein or DNA with available  $\Delta\Delta G$ s and 3D structures. Meanwhile, three blind sets were compiled to test SAMPDI-3D performance and to compare it with other methods. The number of disruptive and non-disruptive mutations in each dataset could be found in [Supplementary Table S2](#). Training and blind datasets are available at <http://compbio.clemson.edu/SAMPDI-3D/>.

#### 2.1.1 Training set for predicting $\Delta\Delta G$ s caused by mutations in the binding protein

For the mutations in protein, we combined the training set constructed by Zhang *et al.* (2018) with the latest mutations collected from the literature as our training set. Zhang’s study used 219 single mutations (called S219) for training and testing, which were collected from ProNIT and dbAMEPNI. To prevent overfitting, we collected additional 200 single mutations (called S200) with experimental  $\Delta\Delta G$ s and wild-type 3D structures from the literature published in recent years that are not included in the ProNIT database. Then, we merged S219 and S200 datasets resulting in 419 single mutations in 96 proteins for training and testing (S419 dataset). It should be mentioned that our training set is almost twice larger than dataset used for development and testing in mCSM-NA and PremPDI.

#### 2.1.2 Training set for predicting $\Delta\Delta G$ s caused by mutations in DNA

For the mutations in DNA, our training set combined the ProNIT database and data from recent literature. It comprises 245 single mismatches and 218 single base-pair substitutions, a total of 463 mutations in 30 proteins with quantitatively characterized  $\Delta\Delta G$ s, among them 123 were taken from ProNIT database. This dataset is termed D463.

#### 2.1.3 ‘Blind’ set for comparing existing methods performance

As mentioned in the introduction, mCSM-NA used 222 single mutation cases (called S222) for training and testing. PremPDI used S219 dataset, which is taken from mCSM-NA training set and dbAMEPNI. To compare SAMPDI-3D with them, we also trained SAMPDI-3D of the same dataset (S219), and used the newly created S200 as a blind test. This is done to avoid dependence of the training set and set up SAMPDI-3D on the same footage as the other methods assuring fair comparison.

#### 2.1.4 Blind set for benchmarking SAMPDI-3D prediction for DNA mutations

To test the performance of SAMPDI-3D model, a blind set of relative binding affinity changes upon single base pair substitution in the PDIs have been constructed by using recent experimental data (Jolma *et al.*, 2013; Yang *et al.*, 2017). The blind set includes 227 DNA single base pair substitution from 18 TFs, termed T227 dataset. The only software capable of modeling  $\Delta\Delta G$ s in such cases is FoldX. Therefore, SAMPDI-3D and FoldX performance was

compared on T227 dataset by using the PCC between relative binding affinity changes ( $\Delta\Delta M$ ) and predicted  $\Delta\Delta G$ . Complete details of the dataset and  $\Delta\Delta M$  could be found in [Supplementary Material](#).

### 2.1.5 Blind set for distinguishing disruptive from non-disruptive protein mutations

We constructed a new blind dataset, which contains 101 single alanine mutations in 28 proteins obtained from dbAMEPNI (Liu et al., 2018). Since this dataset is without experimental  $\Delta\Delta G$ s and only includes descriptions of the impact of mutations on affinity or activity, we classified these mutations into disruptive and non-disruptive based on the provided description (dataset is termed D101). The specific classification conditions could be found in [Supplementary Material](#).

## 2.2 SAMPDI-3D feature design

### 2.2.1 SAMPDI-3D features for predicting $\Delta\Delta G$ s caused by protein's mutation

#### (1) PC properties feature

We have used a set of nine amino acid properties, which have been previously compiled in our published works (Li et al., 2020; Pahari et al., 2020) to predict the changes in protein–DNA binding free energies upon point mutations.

#### (2) Protein secondary structure element (SSE) propensity

The SSE propensity for an entire protein is given by:

$$P_{ss}(i) = \frac{n_i}{N} \quad (1)$$

where  $n_i$  is the number of secondary structure of type  $i$ ,  $N$  is the total number of different types of secondary structure in the protein,  $i = H$  ( $\alpha$ -helix),  $B$  (residue in isolated  $\beta$ -bridge),  $E$  (extended strand, participates in  $\beta$  ladder),  $G$  (3-helix),  $T$  (hydrogen bonded turn),  $S$  (bend). The secondary structure of the protein is obtained by DSSP (Kabsch and Sander, 1983).

#### (3) Amino acid properties

We selected four structural features: secondary structure, solvent accessibility and IUPAC peptide backbone torsion angles (PSI, PHI). All of them were obtained by DSSP (Kabsch and Sander, 1983).

#### (4) Protein–DNA interactions

To reflect the interactions between protein and DNA, we use DSSR (Lu, 2020) to recognize and output contacts, hydrogen bonds and stacking interactions.

#### (5) Experimental condition

Due to different experimental conditions, we also used pH as a feature.

### 2.2.2 SAMPDI-3D features for predicting $\Delta\Delta G$ s caused by DNA's mutations

In addition to protein SSE propensity and PDIs features described above, the following new features were considered:

#### (1) knowledge-based terms

We labeled each different type of DNA mutation. For example, AT to AA is labeled 1, AT to AC is labeled 2 and AT to GC is 3 and so on. We also used binary 0 and 1 to represent whether it is a mismatch and whether it is an AT base pair.

#### (2) Structural feature of mutation site

We used 18 base parameters to describe the structural characteristics of the mutation site, which includes base-pair parameters, base-pair step parameters and base-pair helical parameters. More detailed definition can be found in DSSR software (Lu, 2020).

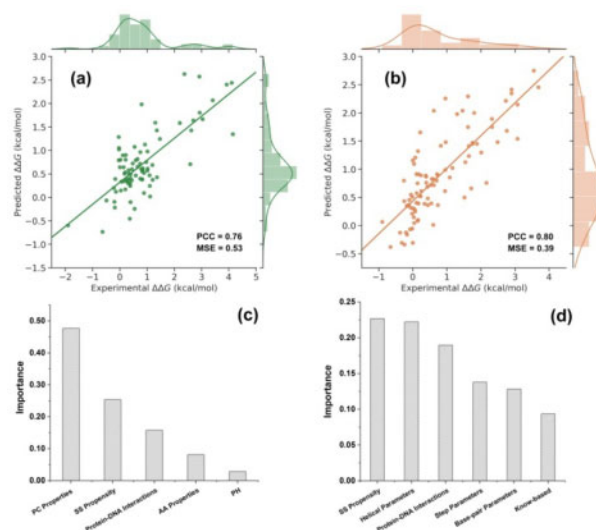

Fig. 1. Plot of SAMPDI-3D predicted  $\Delta\Delta G$ s against experimental  $\Delta\Delta G$ s in case of 20% of cases in: (a) S419 dataset of  $\Delta\Delta G$ s caused by mutations in the corresponding protein and (b) D463 dataset of  $\Delta\Delta G$ s caused by mutations in DNA. The importance level of each feature selected for predicting  $\Delta\Delta G$ s in case protein mutation (c) and DNA mutations (d). MSE are given in kcal/mol

### 2.3 Regression model development

The SAMPDI-3D model was built and trained using gradient boosted decision trees algorithm, which was implemented by the XGBoost python version (Chen and Guestrin, 2016). It is known to have the advantage to overcome the overfitting effect compared with many other ML methods (Lv et al., 2020) and also works better on unbalanced datasets (Friedman, 2001). For predicting  $\Delta\Delta G$  upon a given mutation, we developed a regression model by using knowledge-based features, structural information and PDI as described above. We trained our model against 80% of the training set present in our compiled dataset and tested it against the remaining 20% data. We also analyzed the importance of each feature by using XGBoost. While we tested many different features, above we outline only features that were shown by XGBoost to have high impact on the performance. All other tested features were removed from the model.

## 3 Results

### 3.1 SAMPDI-3D training and testing

Overfitting is one of our chief concerns while getting more training data is the best option to avoid it. Here, we trained SAMPDI-3D on the two largest available datasets (S419 and D463, respectively and defined in Methods and Materials) containing experimental  $\Delta\Delta G$ s for protein or DNA mutations in protein–DNA complex, which were taken from ProNIT (Kumar et al., 2006) and literature. Our models show the PCCs of predicted with expected/experimental values is 0.76 (with MSE 0.53 kcal/mol) and 0.80 (with MSE of 0.39 kcal/mol) for mutations in protein or DNA when tested on 20% of the dataset. Figure 1a and b depicts the regression plots between experimental and predicted  $\Delta\Delta G$ s.

### 3.2 Feature importance analysis

The SAMPDI-3D is based on descriptors extracted from the protein–DNA 3D structure and sequence. Although we tried numerous features, the goal was to minimize the number of features without compromising the accuracy, so to avoid overfitting. Finally, four types of features are used to develop the model to predict  $\Delta\Delta G$ s caused by a single point mutation in the protein: (i) PC properties feature (Li et al., 2020; Pahari et al., 2020); (ii) protein secondary structure; (iii) interactions between protein and DNA; (iv) experimental pH. The numbers of features in each type are included in

**Table 1.** Comparison of different methods on S200 datasets

| Method    | Cross-validation |      | Blind test(S200) |      |         |
|-----------|------------------|------|------------------|------|---------|
|           | PCC              | MSE  | PCC              | MSE  | P-value |
| FoldX     | NA               | NA   | 0.07             | 7.12 | 1.00e-4 |
| mCSM-NA   | 0.54             | NA   | 0.28             | 2.13 | 4.36e-2 |
| PremPDI   | 0.71             | 0.74 | 0.30             | 1.38 | 6.94e-2 |
| SAMPDI    | 0.58             | 0.29 | 0.15             | 1.12 | 1.20e-3 |
| SAMPDI-3D | 0.73             | 0.72 | 0.43             | 0.90 |         |

MSE of  $\Delta\Delta G$  prediction in kcal/mol.

'NA' indicates data are unavailable.

P-value was obtained by using the Fisher *r*-to-*z* transformation to assess the significance of the difference between two correlation coefficients.

**Supplementary Table S3.** In the model of predicting  $\Delta\Delta G$ s caused by a mutation in DNA, besides the above features, DNA structure at the mutations site is also considered. To get further insights into the relative contributions of features, we used the decision tree algorithm implemented in the XGBoost (Chen and Guestrin, 2016) to train our model, and gradient boosting to calculate the importance of the features (Chen and Guestrin, 2016). It can be seen in Figure 1c and d that PC properties is the most important feature to predict  $\Delta\Delta G$ s caused by mutations in the protein. This finding reflects previous observations that the type of amino acid substitution is one of the most informative metrics identifying disease-causing SNPs (David and Sternberg, 2015; Vitkup *et al.*, 2003). SSE propensity is the second highest and the highest important feature for predicting  $\Delta\Delta G$ s caused by protein and DNA mutations, respectively. This finding is along the lines of previous investigations indicating that protein structure is an essential factor in protein-DNA recognition (Rohs *et al.*, 2010). The third highest contributing feature is the interaction between protein and DNA, which means hydrogen bonds, contacts and base-pair stacking also play important roles in the process of protein-DNA binding (Kool, 2001; Rohs *et al.*, 2009; Rutledge *et al.*, 2007). It should be emphasized that in both models, the number of features were kept as few as possible and this was indeed achieved without compromising the accuracy.

### 3.3 Evaluating the performance on the blind datasets

#### 3.3.1 Performance for the mutations in protein

To compare the SAMPDI-3D with other existing state-of-the-art methods, including SAMPDI, PremPDI, mCSM-NA and FoldX, we used S219 as a training set. Among the above mentioned methods, PremPDI and mCSM-NA are ML methods and were trained on S222 or S219. Thus, the new set S200 that we developed can serve as a blind test. To assure fair comparison, we re-trained SAMPDI-3D on the same dataset, the S219 set. Results are shown in Table 1. One can see (Table 1) that SAMPDI-3D PCC of five-fold cross-validations can still reach 0.73 with only a slight increase in MSE, comparing with training on the S419. It is noted that SAMPDI possesses the lowest MSE because only 105 interfacial mutations are included in its training set. Table 1 summarizes the results and shows that SAMPDI-3D outperforms other approaches, some by a large margin, especially on blind dataset. Furthermore, we evaluated the difference between SAMPDI-3D predictions and other methods prediction and obtained *P*-values indicate that SAMPDI-3D is quite different from the rest (Table 1). Also, our model keeps similar performance on interfacial and non-interfacial blind sets (Supplementary Table S4).

#### 3.3.2 Performance for the mutations in DNA

Since we used all the collected data to train our SAMPDI-3D for predicting the DNA mutations, we further built a blind test set, which consisted of 227 DNA single base pair substitution from 17 TFs (T227 dataset). For this blind test set, the relative binding affinity ( $\Delta\Delta M$ ) was constructed by using the recent experimental data. Due to the lack of comparable ML methods, we compared our method

**Table 2.** Comparative performance of SAMPDI-3D on T227 blind dataset

| Method    | Blind test(T227) |         |
|-----------|------------------|---------|
|           | PCC              | P-value |
| SAMPDI-3D | 0.42             |         |
| FoldX     | 0.17             | 2.10e-3 |

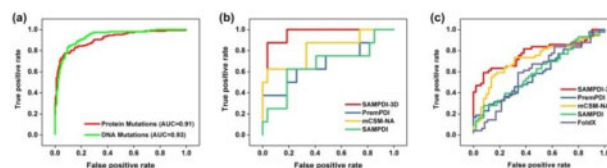

**Fig. 2.** ROC Curves for (a) predicting mutations disrupting PDIs using SAMPDI-3D, (b) predicting protein mutations disrupting PDIs using different methods and (c) SAMPDI-3D with other methods applied on blind dataset

with FoldX. The results are shown in Table 2 and it is shown that SAMPDI-3D performs much better than FoldX achieving a correlation coefficient of 0.42, compared with a correlation coefficient of 0.17 for FoldX (Table 2). It is also indicated that SAMPDI-3D predictions are distinctively different from FoldX resulting in low *P*-value (Table 2). The results on interfacial and non-interfacial blind sets also show that the performance of SAMPDI-3D is better than FoldX (Supplementary Table S5).

### 3.4 The ability of SAMPDI-3D to identify disruptive and non-disruptive mutations

#### 3.4.1 SAMPDI-3D to identify disruptive and non-disruptive mutations in protein and DNA

It is almost certain that disruptive mutations are disease-causing, while non-disruptive may or may not be benign. Thus, mutations may not completely abolish the formation of complexes, and they will be classified as non-disruptive, but may change binding affinity or specificity to an extent to cause disease. To further evaluate the performance of our method, we performed Receiver Operating Characteristics (ROC) analysis to classify mutations into disruptive and non-disruptive based on binding free energy changes. Here, we classify the disruptive mutations as  $|\Delta\Delta G| > 1$  kcal/mol and non-disruptive as  $|\Delta\Delta G| < 1$  kcal/mol. This threshold is also successfully employed in SAMPDI (Peng *et al.*, 2018) and PremPDI (Zhang *et al.*, 2018). Figure 2a shows the ROC of SAMPDI-3D for 419 protein mutations (S419 dataset) and 463 DNA mutations (D463 dataset) which are classified into disruptive and non-disruptive based on above threshold. The resulting area under the curve (AUC) is 0.91 and 0.93, respectively, indicating the excellent capability of SAMPDI-3D to distinguish disruptive from non-disruptive mutations.

#### 3.4.2 Comparison of SAMPDI-3D with other methods

We also compared the performance on several existing state-of-the-art ML methods, but none of their training sets were the same as ours. To fairly compare the performance of SAMPDI-3D with other methods in distinguishing disruptive and non-disruptive protein mutations, we chose the 35 overlapped protein mutations from the training set used for developing SAMPDI, mCSM-NA and PremPDI. Results are shown in Figure 2b.

Figure 2b indicates the excellent performance of SAMPDI-3D in predicting disruptive and non-disruptive protein mutations comparing with other methods. It achieves Matthews correlation coefficient (MCC) of 0.84 and AUC of 0.96 with an accuracy and precision of 0.94 and 0.88 respectively (Supplementary Table S1). All other methods perform much worse.

**Table 3.** Performance of SAMPDI-3D and other methods in predicting disruptive and non-disruptive protein mutations

| Method    | Accuracy | Precision | MCC  | AUC  |
|-----------|----------|-----------|------|------|
| SAMPDI-3D | 0.76     | 0.88      | 0.55 | 0.78 |
| SAMPDI    | 0.62     | 0.62      | 0.26 | 0.60 |
| PremPDI   | 0.60     | 0.70      | 0.22 | 0.59 |
| mCSM-NA   | 0.71     | 0.69      | 0.42 | 0.72 |
| FoldX     | 0.63     | 0.64      | 0.25 | 0.60 |

### 3.4.3 Comparison of SAMPDI-3D with other methods on the blind dataset

We also constructed a blind dataset to distinguish between disruptive and non-disruptive mutations. The blind dataset contains 101 single alanine mutations in 28 proteins obtained from dbAMEPNI (Liu et al., 2018) and is classified into disruptive and non-disruptive based on the impact over affinity (D101 dataset). ROC curves are shown in Figure 2c and AUC, accuracy and MCC values are presented in Table 3, it demonstrates that the performance of SAMPDI-3D is notable in estimating protein mutation effects (disruptive) for blind dataset and it is better than other methods.

### 3.5 Computational time

One of the important advantages of ML algorithms is that they are quite fast, and thus suitable for high-throughput predictions. Here, we compare the computational time of SAMPDI-3D with other existing methods to predict single mutations for a given protein-DNA complex (PDBID: 5E24). The results are averaged over 10 independent runs. Since the stand code is not provided in some methods, calculating time is affected by the computing resources and network. The actual time consuming is based on the statistics from submitting the task to obtaining the result. Table 4 shows a rough estimation of the execution time. One can see from Table 4 that SAMPDI-3D is the fastest method which only takes 1.5 s for  $\Delta\Delta G$  prediction caused by a single mutation when tested on the one core of Intel 6148 CPU.

### 3.6 SAMPDI-3D webserver implementation

Our SAMPDI-3D provides a user-friendly web server, which consists of user interface, the local server and the job backend. The web server is freely accessible at <http://compbio.clemson.edu/SAMPDI-3D/>. It is hosted on a light-duty computer server. Three alternatives are available: (i) predict the effect of one single mutation in protein or DNA specified via the users in the given boxes. Users need to provide the structure of the protein-DNA complex by uploading the file in the PDB format. In this way, users can submit a single job. (ii) Predict the effect of single mutations in protein or DNA specified by a list file, user needs to upload the protein in PDB format and mutations list file as well. For the multiple job option, the predicted  $\Delta\Delta G$ s are summarized in a downloadable text file with the same order as in the input 'List\_Mutations.txt' file. (iii) Users can also directly download the SAMPDI-3D stand-alone code from our webpage. Detailed descriptions are included in the readme file that helps user to use the stand-alone code.

## 4 Discussion

In the last decades, the rapid development of whole-genome technology had significantly reduced the cost of gene sequencing, leading to the widely available genome data (Steffl et al., 2013). However, revealing the effect of genetic variants with experimental approaches is time-consuming and expensive. Hence, computational prediction tools and algorithms are being widely and increasingly utilized in biology and medical research (Li et al., 2020, 2021). Among them, predicting changes of protein-DNA affinity caused by the variants through ML is one of the most popular strategies. However, the existing ML methods are trained on limited datasets, not capable of

**Table 4.** Comparison of time of calculation for a single prediction between different  $\Delta\Delta G$  predictors

| Method    | Time of calculation |
|-----------|---------------------|
| FoldX     | 1 min               |
| mCSM-NA   | 1 min               |
| PremPDI   | 80 min              |
| SAMPDI    | 24 min              |
| SAMPDI-3D | 1.5 s               |

dealing with DNA mutations, not tested on blind datasets and not fast enough to be applied on genome-scale investigations.

Here, we report a new ML approach, the SAMPDI-3D, which predicts the change of protein-DNA binding free energy caused by mutations utilizing PC properties, structure of mutation site and protein-DNA interactions. Important distinction of SAMPDI-3D and other methods is that SAMPDI-3D uses much larger training set and thus avoids overfitting. SAMPDI-3D outperforms all existing methods on various benchmarking tests, including test of discriminating disruptive versus non-disruptive mutations. In addition, SAMPDI is the only ML method that allows for predicting  $\Delta\Delta G$ s caused by DNA mutations. Lastly, SAMPDI-3D is very fast making it applicable for genome-wide studies to assess the effect of amino acid and DNA mutations on protein-DNA binding.

### Funding

This work was supported by the National Institutes of Health [R01GM125639]. E.A. was supported by grants from National Institutes of Health [R01GM093937 and P20GM121342].

*Conflict of Interest:* none declared.

### References

- Afek, A. et al. (2020) DNA mismatches reveal conformational penalties in protein-DNA recognition. *Nature*, **587**, 291–296.
- Berger, M.F. et al. (2006) Compact, universal DNA microarrays to comprehensively determine transcription-factor binding site specificities. *Nat. Biotechnol.*, **24**, 1429–1435.
- Chan, L.L. et al. (2008) A general method for discovering inhibitors of protein-DNA interactions using photonic crystal biosensors. *ACS Chem. Biol.*, **3**, 437–448.
- Chen, T. and Guestrin, C. (2016) XGBoost: a scalable tree boosting system. In: *Proceedings of the 22nd ACM SIGKDD International Conference on Knowledge Discovery and Data Mining*. Association for Computing Machinery, San Francisco, California, USA, pp. 785–794.
- Dantas Machado, A.C. et al. (2020) Landscape of DNA binding signatures of myocyte enhancer factor-2B reveals a unique interplay of base and shape readout. *Nucleic Acids Res.*, **48**, 8529–8544.
- David, A. and Sternberg, M.J. (2015) The contribution of missense mutations in core and rim residues of protein-protein interfaces to human disease. *J. Mol. Biol.*, **427**, 2886–2898.
- Friedman, J.H. (2001) Greedy function approximation: a gradient boosting machine. *Ann. Stat.*, **1189**–1232.
- Guo, Y.A. et al. (2018) Mutation hotspots at CTCF binding sites coupled to chromosomal instability in gastrointestinal cancers. *Nat. Commun.*, **9**, 1520.
- Jiao, W. et al.; PCAWG Consortium. (2020) A deep learning system accurately classifies primary and metastatic cancers using passenger mutation patterns. *Nat. Commun.*, **11**, 728.
- Jolma, A. et al. (2013) DNA-binding specificities of human transcription factors. *Cell*, **152**, 327–339.
- Kabsch, W. and Sander, C. (1983) Dictionary of protein secondary structure: pattern recognition of hydrogen-bonded and geometrical features. *Biopolymers*, **22**, 2577–2637.
- Katsamba, P.S. et al. (2002) Kinetic studies of RNA-protein interactions using surface plasmon resonance. *Methods*, **26**, 95–104.
- Kool, E.T. (2001) Hydrogen bonding, base stacking, and steric effects in DNA replication. *Annu. Rev. Biophys. Biomol. Struct.*, **30**, 1–22.

- Kumar,M.D. *et al.* (2006) ProTherm and ProNIT: thermodynamic databases for proteins and protein–nucleic acid interactions. *Nucleic Acids Res.*, **34**, D204–D206.
- Li,G. *et al.* (2020) SAAMBE-SEQ: a sequence-based method for predicting mutation effect on protein–protein binding affinity. *Bioinformatics*, **37**, 992–999.
- Li,G. *et al.* (2021) SAAFEC-SEQ: a sequence-based method for predicting the effect of single point mutations on protein thermodynamic stability. *Int. J. Mol. Sci.*, **22**, 606.
- Liang,L. *et al.* (2021) Single-molecule multiplexed profiling of protein–DNA complexes using Magnetic Tweezers. *J. Biol. Chem.*, **296**, 100327.
- Liu,L. *et al.* (2018) dbAMEPNI: a database of alanine mutagenic effects for protein–nucleic acid interactions. *Database J. Biol. Databases Curation*, **2018**, bay034.
- Livingstone,M. *et al.* (2017) Investigating DNA-, RNA-, and protein-based features as a means to discriminate pathogenic synonymous variants. *Hum. Mut.*, **38**, 1336–1347.
- Lu,X.J. (2020) DSSR-enabled innovative schematics of 3D nucleic acid structures with PyMOL. *Nucleic Acids Res.*, **48**, e74.
- Lv,X. *et al.* (2020) Accurately predicting mutation-caused stability changes from protein sequences using extreme gradient boosting. *J. Chem. Inform. Model.*, **60**, 2388–2395.
- Pahari,S. *et al.* (2020) SAAMBE-3D: predicting effect of mutations on protein–protein interactions. *Int. J. Mol. Sci.*, **21**, 2563.
- Peng,Y. *et al.* (2018) Predicting protein–DNA binding free energy change upon missense mutations using modified MM/PBSA approach: SAMPDI webserver. *Bioinformatics*, **34**, 779–786.
- Pires,D.E.V. and Ascher,D.B. (2017) mCSM-NA: predicting the effects of mutations on protein–nucleic acids interactions. *Nucleic Acids Res.*, **45**, W241–W246.
- Riley,T.R. *et al.* (2014) SELEX-seq: a method for characterizing the complete repertoire of binding site preferences for transcription factor complexes. *Methods Mol. Biol.*, **1196**, 255–278.
- Rohs,R. *et al.* (2010) Origins of specificity in protein–DNA recognition. *Annu. Rev. Biochem.*, **79**, 233–269.
- Rohs,R. *et al.* (2009) The role of DNA shape in protein–DNA recognition. *Nature*, **461**, 1248–1253.
- Rutledge,L.R. *et al.* (2007) Characterization of the stacking interactions between DNA or RNA nucleobases and the aromatic amino acids. *Chem. Phys. Lett.*, **444**, 167–175.
- Ryder,S.P. *et al.* (2008) Quantitative analysis of protein–RNA interactions by gel mobility shift. *Methods Mol. Biol.*, **488**, 99–115.
- Steffl,S. *et al.* (2013) Molecular mechanisms of disease-causing missense mutations. *J. Mol. Biol.*, **425**, 3919–3936.
- Stiewe,T. and Haran,T.E. (2018) How mutations shape p53 interactions with the genome to promote tumorigenesis and drug resistance. *Drug Resist. Updates Rev. Comment. Antimicrob. Anticancer Chemother.*, **38**, 27–43.
- Stockley,P.G. (2009) Filter-binding assays. *Methods Mol. Biol.*, **543**, 1–14.
- Velazquez-Campoy,A. *et al.* (2004) Isothermal titration calorimetry. *Curr. Protoc. Cell Biol.*, **17**, 18.
- Vitkup,D. *et al.* (2003) The amino-acid mutational spectrum of human genetic disease. *Genome Biol.*, **4**, R72.
- Vivian,J.T. and Callis,P.R. (2001) Mechanisms of tryptophan fluorescence shifts in proteins. *Biophys. J.*, **80**, 2093–2109.
- Wang,B. *et al.* (2020) Structural insights into target DNA recognition by R2R3-MYB transcription factors. *Nucleic Acids Res.*, **48**, 460–471.
- Wells,A. *et al.* (2019) Ranking of non-coding pathogenic variants and putative essential regions of the human genome. *Nat. Commun.*, **10**, 5241.
- Williamson,K.A. *et al.* (2020) Recurrent heterozygous PAX6 missense variants cause severe bilateral microphthalmia via predictable effects on DNA–protein interaction. *Genet. Med.*, **22**, 598–609.
- Yang,L. *et al.* (2017) Transcription factor family-specific DNA shape readout revealed by quantitative specificity models. *Mol. Syst. Biol.*, **13**, 910.
- Yang,Y. *et al.* (2016) Binding analysis of methyl-CpG binding domain of MeCP2 and Rett Syndrome Mutations. *ACS Chem. Biol.*, **11**, 2706–2715.
- Yoshiura,K. *et al.* (2006) A SNP in the ABCC11 gene is the determinant of human earwax type. *Nat. Genet.*, **38**, 324–330.
- Zhang,N. *et al.* (2018) PremPDI estimates and interprets the effects of missense mutations on protein–DNA interactions. *PLoS Comput. Biol.*, **14**, e1006615.
- Zhao,Y. *et al.* (2012) Improved models for transcription factor binding site identification using nonindependent interactions. *Genetics*, **191**, 781–790.
